# Supplementary material for: Impact of government-funded insulin pump programs on insulin pump use in Canada: a cross-sectional study using the National Diabetes Repository
Source: PubMed Central journal article supplement — BMJ Open Diabetes Res Care. 2021 Oct 5;9(1):e002371. doi: 10.1136/bmjdrc-2021-002371 (PMC8496375; doi:10.1136/bmjdrc-2021-002371), 2021-10-05
Supplement: bmjdrc-2021-002371supp001.pdf [file bmjdrc-2021-002371supp001.pdf]

Supplementary Figure 1: Study flow diagram

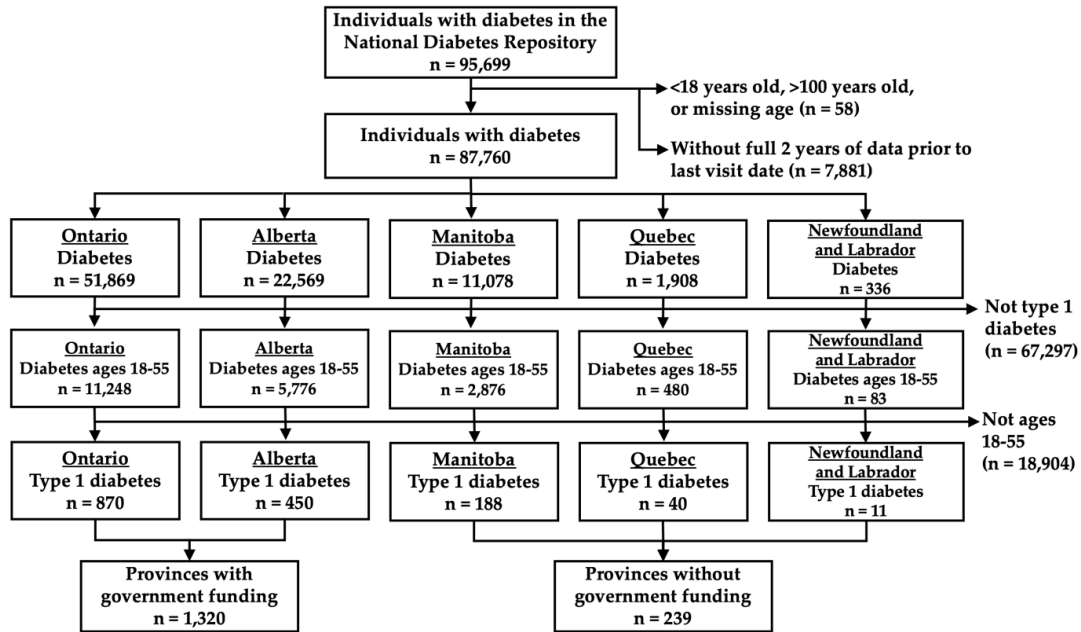

**Supplementary Table 1: Details for government-funded insulin pump programs for provinces included in the National Diabetes Repository**

| Province                               | Pump Coverage | Supply Coverage | Age Criteria    | Reimbursement Constraints                                                                                                                                                                                                                                                                                                                                                               | Date of Inception      | Total Population in 2019 <sup>11</sup> | Estimated Population with Type 1 Diabetes <sup>12†</sup> |
|----------------------------------------|---------------|-----------------|-----------------|-----------------------------------------------------------------------------------------------------------------------------------------------------------------------------------------------------------------------------------------------------------------------------------------------------------------------------------------------------------------------------------------|------------------------|----------------------------------------|----------------------------------------------------------|
| Ontario <sup>1,2</sup>                 | Yes           | Yes             | None            | <ul style="list-style-type: none"> <li>- Eligible for new replacement pump every 5 years</li> <li>- Insulin pump: up to \$6,300 reimbursement</li> <li>- Pump supplies: up to \$2,400 per year</li> </ul>                                                                                                                                                                               | 2008                   | 14,467,162                             | 28,630-57,260                                            |
| Alberta <sup>3,4</sup>                 | Yes           | Yes             | None            | <ul style="list-style-type: none"> <li>- Eligible for new replacement pump every 5 years</li> <li>- Infusion sets: up to 100 units per 100 days</li> <li>- Cartridges/reservoirs/pods: up to 100 units per 100 days</li> <li>- Inserters: up to 1 unit per year</li> </ul>                                                                                                              | 2013                   | 4,343,951                              | 7,260-14,520                                             |
| Quebec <sup>5</sup>                    | No*           | No*             | ≥18 not covered | <ul style="list-style-type: none"> <li>- Eligible for new replacement pump every 4 years</li> <li>- Insulin pump: up to \$6,300 reimbursement</li> <li>- Pump supplies: up to \$4,000 per year</li> </ul> <p>*Adults are eligible to be maintained in the Insulin Pump Access Program if they were previously part of the program as a youth and they meet annual clinical criteria</p> | 2011                   | 8,465,271                              | 12,380-24,760                                            |
| Manitoba <sup>6</sup><br><sup>-8</sup> | No            | Yes*            | ≥18 not covered | *Supplies are covered by the Manitoba PharmaCare program                                                                                                                                                                                                                                                                                                                                | 1995 (see note below*) | 1,364,223                              | 1,955-3,910                                              |

|                                         |            |            |                 |                                                                                                                                                                                                                                                                                                                                                                                                                                                                                                                                                            |      |         |             |
|-----------------------------------------|------------|------------|-----------------|------------------------------------------------------------------------------------------------------------------------------------------------------------------------------------------------------------------------------------------------------------------------------------------------------------------------------------------------------------------------------------------------------------------------------------------------------------------------------------------------------------------------------------------------------------|------|---------|-------------|
|                                         |            |            |                 | beyond the age of 18 based on an income-linked deductible                                                                                                                                                                                                                                                                                                                                                                                                                                                                                                  |      |         |             |
| Newfoundland & Labrador <sup>9,10</sup> | Age: 18-24 | Age: 18-24 | ≥25 not covered | <ul style="list-style-type: none"> <li>- Eligible for new replacement pump every 4 years</li> <li>- Insulin pump: up to 100% of costs covered*</li> <li>- Pump supplies: up to 100% of cost covered*</li> </ul> <p>*2016-17 report: average annual cost of \$3277 per adult client (\$6800 for pump &amp; \$1577 for supplies)</p> <ul style="list-style-type: none"> <li>- Average annual cost of insulin pump (replace pump every 4 years): \$6800/4 = \$1700</li> <li>- Average annual cost of insulin pump supplies: \$3277-\$1700 = \$1577</li> </ul> | 2010 | 524,126 | 1,195-2,390 |

\*Note: Insulin pump supply costs for adult patients (≥18) are covered under the Manitoba PharmaCare program (established in 1995). However, the program does not cover insulin pumps for adult patients (≥18). This is different than the Manitoba Pediatric Insulin Pump Program (established in 2012), which covers insulin pumps and pump supplies for patients under the age of 18.

† Estimated population with type 1 diabetes in each province derived using 5-10% of Statistics Canada estimates for numbers of people ages 12-64 with diabetes in 2019

**Supplementary Table 2: Characteristics of participants using and not using insulin pumps in provinces with and without government funded insulin pump programs**

| Characteristic           | Pump Funding Program<br>(n = 1,320) |                              | p-value | No Pump Funding Program<br>(n = 239) |                              | p-value |
|--------------------------|-------------------------------------|------------------------------|---------|--------------------------------------|------------------------------|---------|
|                          | Insulin Pump<br>(n = 631)           | No Insulin Pump<br>(n = 689) |         | Insulin Pump<br>(n = 90)             | No Insulin Pump<br>(n = 149) |         |
| <b>Demographic</b>       |                                     |                              |         |                                      |                              |         |
| Age (years)              | 38 [29,47]                          | 43 [33,50]                   | <0.0001 | 39 [31,46]                           | 43 [34,50]                   | 0.03    |
| Female, n (%)            | 316 (50.1%)                         | 301 (43.7%)                  | 0.02    | 45 (50%)                             | 72 (48.3%)                   | 0.80    |
| Provider Age (years)     | 51 [41,58]                          | 50 [40,60]                   | 0.90    | 51 [43,56]                           | 45 [35,53]                   | 0.007   |
| Provider Sex, n (%)      |                                     |                              | 0.18    |                                      |                              | 0.70    |
| Female                   | 262 (41.8%)                         | 307 (44.8%)                  |         | 28 (31.1%)                           | 50 (33.6%)                   |         |
| Male                     | 356 (56.8%)                         | 362 (52.8%)                  |         | 62 (68.9%)                           | 99 (66.4%)                   |         |
| Provider Type, n (%)     |                                     |                              | 0.33    |                                      |                              | 0.13    |
| Family Physician         | 616 (97.6%)                         | 680 (98.7%)                  |         | 89 (98.9%)                           | 139 (93.3%)                  |         |
| Nurse Practitioner       | 11 (1.7%)                           | 6 (0.9%)                     |         | ≤5                                   | 9 (6%)                       |         |
| <b>Clinical</b>          |                                     |                              |         |                                      |                              |         |
| Hypertension, n (%)      | 94 (14.9%)                          | 180 (26.1%)                  | <0.0001 | 17 (18.9%)                           | 55 (36.9%)                   | 0.003   |
| Depression, n (%)        | 182 (28.8%)                         | 255 (37%)                    | 0.002   | 23 (25.6%)                           | 38 (25.5%)                   | 0.99    |
| Osteoarthritis, n (%)    | 37 (5.9%)                           | 59 (8.6%)                    | 0.06    | 21 (23.3%)                           | 52 (34.9%)                   | 0.06    |
| DBP (mmHg)               | 76.72 ± 9.58                        | 77.34 ± 10.15                | 0.29    | 75.07 ± 9.22                         | 80.42 ± 8.97                 | 0.001   |
| SBP (mmHg)               | 124.53 ± 15.61                      | 124.99 ± 17.38               | 0.64    | 125.68 ± 16.74                       | 131.19 ± 17.56               | 0.07    |
| BMI (kg/m <sup>2</sup> ) | 28.53 ± 8.32                        | 29.79 ± 7.91                 | 0.04    | 29.50 ± 9.07                         | 32.30 ± 10.28                | 0.17    |
| <b>Laboratory</b>        |                                     |                              |         |                                      |                              |         |
| HbA1c (%)                | 8.34 ± 1.98                         | 8.52 ± 1.99                  | 0.13    | 8.64 ± 1.68                          | 9.12 ± 2.19                  | 0.11    |
| Creatinine (µmol/L)      | 73 [62,87]                          | 74 [61,90]                   | 0.02    | 74 [58,87]                           | 64 [52,82]                   | 0.92    |
| ACR (mg/mmol)            | 1.00 [0.50,4.43]                    | 1.46 [0.60,8.20]             | 0.09    | 0.80 [0.50,2.30]                     | 1.30 [0.40,4.10]             | 0.43    |
| <b>Medications</b>       |                                     |                              |         |                                      |                              |         |
| Statin, n (%)            | 99 (15.7%)                          | 176 (25.5%)                  | <0.0001 | 15 (16.7%)                           | 37 (24.8%)                   | 0.14    |
| ACEi/ARB, n (%)          | 93 (14.7%)                          | 164 (23.8%)                  | <0.0001 | 12 (13.3%)                           | 41 (27.5%)                   | 0.01    |
| <b>Risk Factors</b>      |                                     |                              |         |                                      |                              |         |
| Smoking Status, n (%)    |                                     |                              | 0.23    |                                      |                              | 0.81    |
| Current                  | 63 (10%)                            | 93 (13.5%)                   |         | ≤5                                   | ≤5                           |         |
| Never                    | 92 (14.6%)                          | 96 (13.9%)                   |         | 0 (0%)                               | 0 (0%)                       |         |
| Past                     | 115 (18.2%)                         | 130 (18.9%)                  |         | ≤5                                   | ≤5                           |         |
| Alcohol Status, n (%)    |                                     |                              | 0.008   |                                      |                              | 0.07    |
| Current                  | 96 (15.2%)                          | 135 (19.6%)                  |         | 11 (12.2%)                           | 37 (24.8%)                   |         |
| Never                    | 11 (1.7%)                           | 10 (1.5%)                    |         | 0 (0%)                               | ≤5                           |         |
| Past                     | 78 (12.4%)                          | 116 (16.8%)                  |         | ≤5                                   | ≤5                           |         |
| <b>Socioeconomic</b>     |                                     |                              |         |                                      |                              |         |
| Income Quintile, n (%)   |                                     |                              |         |                                      |                              |         |
| 1 (lowest)               | 122 (20.7%)                         | 179 (28.8%)                  | 0.001   | 8 (12.3%)                            | 16 (22.5%)                   | 0.12    |
| 2                        | 111 (18.8%)                         | 133 (21.4%)                  | 0.27    | 11 (16.9%)                           | 14 (19.7%)                   | 0.67    |

|                        |             |             |      |            |             |      |
|------------------------|-------------|-------------|------|------------|-------------|------|
| 3                      | 136 (23.1%) | 114 (18.4%) | 0.04 | 21 (32.3%) | 17 (23.9%)  | 0.28 |
| 4                      | 114 (19.4%) | 100 (16.1%) | 0.14 | 14 (21.5%) | 12 (16.9%)  | 0.49 |
| 5 (highest)            | 106 (18%)   | 95 (15.3%)  | 0.21 | 11 (16.9%) | 12 (16.9%)  | 1.00 |
| Urban Residence, n (%) | 510 (82.3%) | 539 (79.9%) | 0.27 | 63 (70%)   | 104 (70.3%) | 0.96 |

Data presented as means  $\pm$  standard deviations, median [interquartile range], or frequency (%).

Continuous variables were compared by Students t-tests or Wilcoxon rank sum depending on normality of distribution, and categorical variables were compared by Chi-square.

Data was missing for provider age (n=197, 13%), provider sex (n=33, 2%), provider type (n=8, 0.5%), diastolic blood pressure (n=263, 17%), systolic blood pressure (n=263, 17%), BMI (n=719, 46%), HbA1c (n=259, 17%), total cholesterol (n=573, 37%), LDL-C (n=620, 40%), HDL-C (n=545, 35%), triglyceride (n=571, 37%), creatinine (n=304, 20%), ACR (n=748, 48%), income quintile (n=213, 13.7%), and urban residence (n=26, 1.7%).

DBP diastolic blood pressure; SBP systolic blood pressure; BMI body mass index; HbA1c hemoglobin A1c; TC total cholesterol; LDL-C low-density lipoprotein cholesterol; HDL-C high-density lipoprotein cholesterol; ACR albumin-to-creatinine ratio; ACEi angiotensin-converting enzyme inhibitor; ARB angiotensin receptor blocker.

**Supplementary Table 3: Odds of insulin pump use adjusting for pump funding program status and other characteristics (multivariable generalized estimating question model)**

| Predictor                        | Model 1*         | Model 2†         | Model 3‡         |
|----------------------------------|------------------|------------------|------------------|
| Pump Funding Program (yes v. no) | 1.48 (1.00-2.18) | 1.44 (1.00-2.06) | 1.42 (1.02-1.96) |
| Age (per 1 year increase)        | -                | 0.97 (0.96-0.98) | 0.97 (0.96-0.98) |
| Sex (male vs female)             | -                | 0.81 (0.67-0.97) | 0.81 (0.67-0.97) |
| HbA1c (per 1% increase)          | -                | 0.94 (0.84-0.99) | 0.94 (0.89-1.00) |
| Income Quintile (ref = 1)        |                  |                  |                  |
| 2                                |                  |                  | 1.21 (0.87-1.69) |
| 3                                | -                | -                | 1.79 (1.27-2.53) |
| 4                                | -                | -                | 1.54 (0.93-2.56) |
| 5 (highest)                      | -                | -                | 1.53 (0.94-2.48) |
| Urban Residence (v. rural)       | -                | -                | 1.13 (0.84-1.54) |

\*Model 1 unadjusted

†Model 2 adjusted for age, sex, HbA1c

‡Model 3 adjusted for age, sex, HbA1c, income quintile, urban residence v. rural

HbA1c, hemoglobin A1c

HbA1c hemoglobin A1c

**Supplementary Table 4: Association between individual characteristics and odds of insulin pump use according to pump funding program status (multivariable generalized estimating equation model)**

| Characteristic             | Pump Funding Program | No Funding Program |
|----------------------------|----------------------|--------------------|
| <i>Demographic</i>         |                      |                    |
| Age                        | 0.97 (0.97-0.98)     | 0.97 (0.95-1.00)   |
| Male vs Female             | 0.78 (0.65-0.93)     | 0.97 (0.63-1.50)   |
| Provider Age               | 1.00 (0.99-1.01)     | 1.04 (1.01-1.07)   |
| Provider Sex               |                      |                    |
| Male vs Female             | 1.17 (0.88-1.55)     | 1.40 (0.85-2.32)   |
| <i>Clinical</i>            |                      |                    |
| Depression                 | 0.69 (0.59-0.80)     | 0.94 (0.52-1.68)   |
| Osteoarthritis             | 0.67 (0.47-0.96)     | 0.57 (0.36-0.92)   |
| Hypertension               | 0.50 (0.38-0.66)     | 0.43 (0.20-0.91)   |
| BMI                        | 0.98 (0.96-1.00)     | 0.97 (0.91-1.02)   |
| <i>Laboratory</i>          |                      |                    |
| HbA1c                      | 0.96 (0.91-1.00)     | 0.90 (0.75-1.07)   |
| Creatinine                 | 1.00 (1.00-1.00)     | 1.00 (0.99-1.01)   |
| ACR                        | 1.00 (1.00-1.00)     | 1.00 (0.99-1.00)   |
| <i>Medications</i>         |                      |                    |
| Statin                     | 0.54 (0.45-0.66)     | 0.62 (0.35-1.10)   |
| ACEi/ARB                   | 0.55 (0.46-0.67)     | 0.40 (0.19-0.84)   |
| <i>Risk Factors</i>        |                      |                    |
| Smoking Status             |                      |                    |
| Missing vs Current         | 1.43 (0.95-2.14)     | 0.67 (0.23-2.01)   |
| Never vs Current           | 1.41 (0.84-2.36)     | -                  |
| Past vs Current            | 1.29 (0.86-1.94)     | 0.75 (0.31-1.83)   |
| Alcohol Status             |                      |                    |
| Missing vs Current         | 1.46 (1.07-2.00)     | 2.42               |
| Never vs Current           | 1.51 (0.79-2.88)     | -                  |
| Past vs Current            | 0.94 (0.68-1.31)     | 2.24               |
| <i>Socioeconomic</i>       |                      |                    |
| Income Quintile (ref = 1)  |                      |                    |
| 2                          | 1.21 (0.90-1.61)     | 1.56 (0.40-6.04)   |
| 3                          | 1.72 (1.30-2.28)     | 2.47 (0.63-9.69)   |
| 4                          | 1.64 (1.09-2.46)     | 2.24 (0.82-6.16)   |
| 5 (highest)                | 1.59 (1.03-2.43)     | 1.79 (0.67-4.78)   |
| Urban Residence (v. rural) | 1.14 (0.82-1.60)     | 0.89 (0.47-1.70)   |

Data presented as odds ratio estimates with corresponding 95% confidence intervals (OR, 95% CI). BMI body mass index; HbA1c hemoglobin A1c; LDL-C low-density lipoprotein cholesterol; HDL-C high-density lipoprotein cholesterol; ACR albumin-to-creatinine ratio; ACEi angiotensin-converting enzyme inhibitor; ARB angiotensin receptor blocker

## References for Supplementary Table 1:

1. Insulin pumps and diabetes supplies [Internet]. Government of Ontario. 2016 [cited 2020Oct30]. Available from: <https://www.ontario.ca/page/insulin-pumps-and-diabetes-supplies>
2. Ontario Funds Free Insulin Pumps for Adults [Internet]. Ontario Newsroom. 2008 [cited 2020Oct30]. Available from: <https://news.ontario.ca/en/release/1040/ontario-funds-free-insulin-pumps-for-adults>
3. Insulin Pump Therapy Program Eligibility Criteria [Internet]. Government of Alberta. 2019 [cited 2020Oct30]. Available from: <https://www.alberta.ca/assets/documents/health-insulin-pump-therapy-program-eligibility.pdf>
4. Alberta Health Insulin Pump Therapy Program [Internet]. Alberta Blue Cross. 2013 [cited 2020Oct30]. Available from: <https://www.ab.bluecross.ca/pdfs/pharmacy-benefacts/392-insulin-pump-therapy-program.pdf>
5. Insulin Pump Access Program [Internet]. Gouvernement du Québec. 2019 [cited 2020Oct30]. Available from: <https://www.quebec.ca/en/health/health-issues/a-z/diabetes/insulin-pump-access-program/>
6. Extending Coverage of Insulin Pumps and Supplies to Manitobans of All Ages [Internet]. Manitoba Provincial Council. 2016 [cited 2020Oct30]. Available from: <https://cwlmanitoba.ca/wp-content/uploads/2018/08/Resolution-2016.01-Insulin-Pumps-1.pdf>
7. THE PRESCRIPTION DRUGS COST ASSISTANCE ACT [Internet]. Province of Manitoba. 1995 [cited 2020Oct30]. Available from: <https://www.gov.mb.ca/health/mdbif/docs/sdr.pdf>
8. Pharmacare Program: Province of Manitoba [Internet]. Province of Manitoba - Health, Seniors and Active Living. 2020 [cited 2020Oct30]. Available from: <https://www.gov.mb.ca/health/pharmacare/index.html>
9. Diabetes in Newfoundland and Labrador [Internet]. Auditor General of Newfoundland and Labrador. 2011 [cited 2020Oct30]. Available from: <https://www.ag.gov.nl.ca/ag/annualReports/2010AnnualReport/2.9%20-%20Diabetes%20in%20NL.pdf>
10. Diabetes Report and Insulin Pump Program [Internet]. Government of Newfoundland and Labrador. 2016 [cited 2020Oct30]. Available from: <https://atipp-search.gov.nl.ca/public/atipp/requestdownload?id=9650>
11. Population Estimates, Quarterly [Internet]. Statistics Canada. Available from: <https://www150.statcan.gc.ca/t1/tb11/en/tv.action?pid=1710000901>.



12. Diabetes, by age group [Internet]. Statistics Canada. Available from: <https://www150.statcan.gc.ca/t1/tbl1/en/tv.action?pid=1310009607>.
